# Supplementary material
Source: publisher figshare collection journal article supplement (https://tandf.figshare.com/ndownloader/files/20283822)
Supplement: Supplementary file 1 [file 20283822]

Online Supplementary Material

**ORIGINAL RESEARCH ARTICLE**

**Seasonal variation of flavonoid content in bee bread: Potential impact on hypopharyngeal gland development in** *Apis mellifera* **honey bees**

Thaís de Souza Bovia*, André Caeirob, Sérgio Alexandre Alcantara dos Santosc, Rodrigo Zaluskid, Alex Junji Shinoharaa, Giuseppina Pace Pereira Limae, Maria da Graça Ribeiro Camposb, Luis Antonio Justulin Juniorc, Ricardo de Oliveira Orsia

Corresponding author* Email: [thaisbovi@yahoo.com.br](mailto:thaisbovi@yahoo.com.br)

aNúcleo de Ensino, Ciência e Tecnologia em Apicultura Racional (NECTAR) Universidade Estadual Paulista (UNESP) – Faculdade de Medicina Veterinária e Zootecnia, Botucatu, Brasil.

bFaculdade de Farmácia, Universidade de Coimbra, Portugal.

cInstituto de Biociências, Departamento de Morfologia, UNESP, Botucatu, Brasil.

dUniversidade Federal de Mato Grosso do Sul, Faculdade de Medicina Veterinária e Zootecnia, UFMS-FAMEZ, Campo Grande, Brasil.

eInstituto de Biociências, Departamento de Química e Bioquímica, UNESP, Botucatu, Brasil.


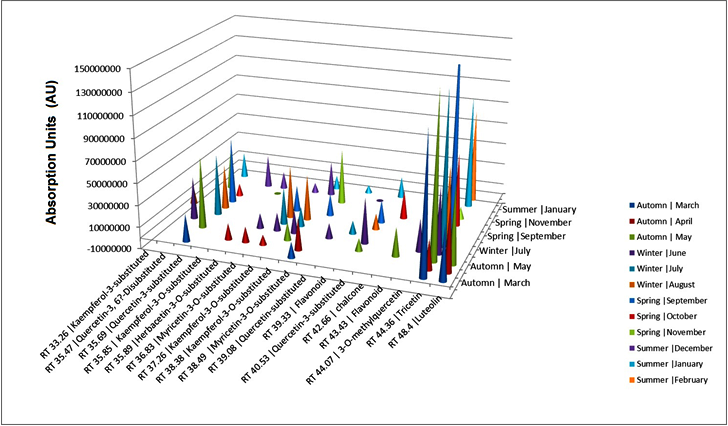


**Figure S1.** Flavonoids profile (flavonols, flavones and chalcones) in bee bread collected in *Apis mellifera* colonies over the seasons.
